# Supplementary material
Source: publisher figshare collection journal article supplement (https://tandf.figshare.com/articles/dataset/_/12118581)
Supplement: Supplementary file 1 [file 4]

Archive with 3 entries (3 files):
- R1 code Table 1&2.zip
- README.rtf
- Supp-Blind.pdf
