# Supplementary material
Source: publisher figshare collection journal article supplement (https://tandf.figshare.com/articles/dataset/_/12118581)
Supplement: Supplementary file 1 [file 4 › README.rtf]

The file “Supp-Blind” includes the proofs of the theoretical results and additional simulation studies.the file “R1 code Table 1&2” includes the R code used to generate the simulated data (jasa_datgen_all_settings) and produce the results in Tables 1 & 2 (jasa_SL_crossfitting-proposed_final). 
